# Supplementary material
Source: publisher site journal article supplement (https://www.degruyter.com/publication/isbn/9783839417805/downloadAsset/9783839417805_Leseprobe.pdf)
Supplement: Supplementary file 1 [file 9783839417805_Leseprobe.pdf]

**Aus:**

**SILVAN WAGNER (Hg.)**

## **Laientheater**

### **Theorie und Praxis einer populären Kunstform**

Mai 2011, 196 Seiten, kart., 23,80 €, ISBN 978-3-8376-1780-1

Laientheater boomt in den unterschiedlichsten Formen – als zunächst unbestimmtes und damit freies Komplementärphänomen zum professionellen Theater. Umso mehr bedarf es einer Reflexion über Formen und Inhalte sowie nicht zuletzt über den Kunstbegriff des Laientheaters.

In einer engen Verzahnung von Theorie und Praxis beleuchten die Beiträge von Guido Apel, Britta Ender, Susanne Knaeble, Eva Wagner und Silvan Wagner zentrale Facetten des Laientheaters und bieten damit Ansätze sowohl für die künstlerische Arbeit von Laientheatergruppen als auch für die wissenschaftliche Diskussion dieses schillernden Phänomens.

**Silvan Wagner** (Dipl.-Mus.-Päd., Dr. phil.) lehrt Ältere Deutsche Philologie an der Universität Bayreuth, ist künstlerischer Leiter der Theatergruppe Bume-rang und arbeitet als Konzertmusiker.

Weitere Informationen und Bestellung unter:

[www.transcript-verlag.de/ts1780/ts1780.php](http://www.transcript-verlag.de/ts1780/ts1780.php)

# Inhalt

---

**Vorwort** | 7

**Einleitung: Laientheater – ein diffuses Phänomen  
als theoretisches Problem und praktische Chance**

Silvan Wagner / Susanne Knaeble | 9

**Regie im Laientheater, oder: Der Umgang  
mit unerfüllbaren Anforderungen**

Silvan Wagner / Britta Ender | 27

**Die Struktur des semiprofessionellen Theaterbereichs**

Britta Ender | 47

**Die Bühne als performativ hergestellter  
Beobachtungsraum**

Susanne Knaeble | 67

**Sprache als Musik. Ein Technikprogramm**

Silvan Wagner | 87

**Das (nicht) perfekte Bühnenbild**

Guido Apel / Susanne Knaeble | 105

**Schminken als Vollendung  
des ‚natürlichen Gesichtsgemäldes‘**

Eva Wagner | 119

**Lampenfieber: Entstehen und Vergehen  
einer Kulturkrankheit**

Silvan Wagner | 135

**Vom Nutzen des narrativen Reality-TV**

Eva Wagner | 161

**Literatur** | 183

**Autorinnen und Autoren** | 191

## Vorwort

---

Theater spielen und über Theaterspielen nachdenken sind im professionellen Bereich zwei institutionell getrennte Betätigungen, die von Schauspielern einerseits und Theaterwissenschaftlern andererseits ausgeübt werden.

Vielleicht kann es sich gerade das nicht institutionalisierte Laientheater leisten, beide Bereiche miteinander in engen Kontakt zu bringen. Dies soll in diesem Buch geschehen: Auf der Basis langjähriger aktiver Laientheatererfahrung und Zusammenarbeit in der *Theatergruppe Bumerang* versuchen die Autoren ihre eigene Praxis in verschiedenen grundlegenden Arbeitsbereichen der Laienbühne theoretisch zu diskutieren.

In diesem Zuge ist ein Buch entstanden, das nicht nur praktische Anregungen gibt, sondern auch theoretische Begründungsmodelle entwirft, die speziell für das Laientheater zugeschnitten sind. Gerade in diese theoretische Diskussion einzusteigen dürfte sich im Einzelfall als sinnvoller für die je eigene Laientheaterpraxis erweisen als eine bloße Umsetzung praktischer Handreichungen.

Zu großem Dank sind wir den Institutionen verpflichtet, die die Drucklegung dieses Buches finanziell und ideell unterstützt haben, dem Universitätsverein Bayreuth, der Friedrich-Baur-Stiftung, der Raiffeisenbank Obermain-Nord, der Stadt Lichtenfels und der Kulturgemeinde Burgkunstadt. Ein Großteil der Druckkosten wurde durch die Einnahmen aus unseren Theaterproduktionen abgedeckt, weshalb dieses Buch seine Existenz auch auf dieser Ebene nicht zuletzt dem Laienschauspiel selbst verdankt.

# Einleitung: Laientheater – ein diffuses Phänomen als theoretisches Problem und praktische Chance

---

SILVAN WAGNER / SUSANNE KNAEBLE

Laientheater ist sowohl grundsätzliches als auch boomendes Kulturphänomen einer künstlerisch-praktischen Interpretation von dramatischen Texten und Stoffen. Die anwachsende gesellschaftliche Bedeutung des deutschsprachigen Laientheaters lässt sich auch an der jüngeren Entwicklung des Dachverbandes *Bund Deutscher Amateurtheater* (BDAT) ablesen, der keineswegs alle Laientheatergruppen erfasst.<sup>1</sup>

Schon wegen dieser zentralen, kulturellen Bedeutung kann das Phänomen Laientheater von einer wissenschaftlichen Untersuchung von Seiten der Theater- und Literaturwissenschaften nicht ausgeschlossen werden; gleichwohl wurde das Laientheater als eigenstän-

---

1 „Gehörten dem BDAT 1980 über die Mitgliedsverbände 612 Amateur Bühnen an, so waren es im Jahr 2000 bereits 1800. Heute sind in den mehr als 2300 Mitgliedsbühnen ca. 100.000 Menschen ehrenamtlich aktiv. Die Bühnen erreichen mit ihren 6000 bis 8000 Inszenierungen pro Jahr bis zu sechs Millionen Zuschauer“ ([http://bdat.wklv.de/cms/upload/Geschichte\\_des\\_BDAT\\_1892\\_2009.pdf](http://bdat.wklv.de/cms/upload/Geschichte_des_BDAT_1892_2009.pdf), eingesehen am 06.08.2010). Zu den unterschiedlichen Geschichten des neueren deutschen Amateurtheaters der alten und neuen Bundesländer vgl. ausführlich Hametner 1993.

dige Kunstform von der Forschung bislang äußerst stiefmütterlich behandelt.<sup>2</sup>

- 
- 2 Die Veröffentlichungen zum Laintheater sind absolut dominiert von praktischen Handreichungen ohne tiefere theoretische Reflexion (vgl. exemplarisch Drenkow/Hoerning [Hg.] 1968, Eichenseer [Hg.] 1991, Eckstein u.a. 2004); dies führt teilweise zu fragwürdigen Selbstverständlichkeiten, etwa der Dominanz von Jahrmarktsmaske und aufwändiger Bühnengestaltung im Kindertheater zuungunsten qualitativer Arbeit im darstellerischen Bereich (vgl. auch Kittel 1997, S. 96). Die eigentliche Forschung zum deutschsprachigen Laienspiel ist äußerst schmal und divergent. Ein Großteil der Forschung betrachtet schmale Ausschnitte der Geschichte des Laienspiels unter historischen Fragestellungen, ohne dabei die gewonnenen Ergebnisse auf ein rezentcs Laintheater anzuwenden und in eine ästhetische Diskussion zu bringen (vgl. Scharrer 1960, Kaufmann 1991, Ko 2002). Viele Veröffentlichungen sind dezidiert dem Schultheater als Sonderform des Laintheaters unter pädagogischen Zielsetzungen gewidmet (eine kommentierte Auswahlbibliographie liegt bei Schwarzwald 1992 vor; mit wissenschaftlichem Anspruch untersuchen Neuhaus 1985, weite Teile von Belgrad [Hg.] 1997 und Liebau u.a. [Hg.] 2005 das Schultheater); eine Verallgemeinerung schulischer Theatermodelle auf das gesamte Laintheater erscheint jedoch nicht als sinnvoll, da die Institution Schule sehr spezifische Rahmenbedingungen setzt, die nicht ohne weiteres auf andere Theaterformationen übertragbar sind. Das Laintheater in der Breite seiner Erscheinungsformen und unter ästhetischen Fragestellungen nimmt nur ein sehr schmaler Bereich der Forschung in den Blick: Von in erster Linie historischer Bedeutung sind die Veröffentlichungen *Das Laienspiel* von Martin Luserke und *Laienspiel und Laintheater* von Rudolf Mirbt; beide Wegbereiter der Laienspielszene des 20. Jahrhunderts betten ihre Überlegungen zum Laintheater in ein pädagogisches Gesamtkonzept ein (vgl. dazu Godde 1990), wobei vor allem Mirbt durch die Etablierung eines eigenen Literaturmarktes für Laienspielstücke eine komplette Loslösung vom Profitheater forciert. Gemeinsam ist in der Laienspielphase vor dem Zweiten Weltkrieg die Zentralstellung eines diffusen Volksbegriffes (vgl. Kaufmann 1991, S. 93-96), eine kompromittierte Ausrichtung, die in der Dissertation *Das volksdeutsche Laienspiel* von Karl Ziegler 1937 ihren peinlichen Höhepunkt erfährt und in keiner Weise

Die vorliegende Aufsatzsammlung versucht weder deskriptiv das diffuse Phänomen Laientheater als Ganzes zu beschreiben, noch normativ bestimmte Arbeits-, Interpretations- und Denkformen für das gesamte Laientheater zu fordern (dafür wären jeweils umfassende Einzeluntersuchungen notwendig, die zum Großteil noch ausstehen); vielmehr ist der Ansatz des vorliegenden Bandes induktiv in dem Sinne, dass eine bestimmte Erscheinungsform des Laientheaters zum Ausgangspunkt sowohl theoretischer wie auch praktischer Überlegungen herangezogen wird, ohne damit einen grundsätzlichen Vorrang dieser Erscheinungsform zu behaupten. Sie realisiert sich in der Theatergruppe Bumerang / Lichtenfels, der alle Autoren des vorliegenden Bandes als langjährige, aktive Mitglieder angehören; es handelt sich dabei um eine Formation, die sich 1995 aus einer ehemaligen Schultheatergruppe entwickelt hat und seitdem jährlich eine Dramenproduktion<sup>3</sup> in eigener Trägerschaft erarbeitet. Mitglieder sind Studie-

---

anschlussfähig erscheint. Der vom Deutschen Amateurtheaterverband unter der Schriftleitung von Michael Hametner herausgegebene Sammelband *Deutsches Amateurtheater – Woher?* von 1993 stellt dahingehend eine besonders wichtige Veröffentlichung dar, da hier der Versuch unternommen wird, unmittelbar nach dem Zusammenschluss des ost- und des westdeutschen Laientheaterverbandes die jeweilige Geschichte der Laientheaterästhetik aufzuarbeiten und dabei auch vor die Zeit von 1945 zurückzugehen. Hier liegt eine Textsammlung vor, die einen kritischen Überblick über die Ausdifferenzierung des Laientheaters im 20. Jahrhundert bietet, deren Schwerpunktsetzung aber auf der historischen Perspektive vor allem des Vereinswesens liegt. Laientheaterästhetik im Spannungsfeld zwischen Theorie und rezenter Praxis wird – trotz der Schwerpunktsetzung auf das Schultheater (s.o.) – in einigen Aufsätzen des Sammelbandes *TheaterSpiel* von Jürgen Belgrad von 1997 diskutiert. Notwendigerweise bleiben diese ersten Ansätze einer Laientheaterästhetik aber divergent und momenthaft. Der Versuch einer geschlossenen, theoretischen Annäherung von den spezifischen Bedingungen des Laientheaters aus an seine Praxis, wie ihn die vorliegende Aufsatzsammlung darstellt, ist bislang Desiderat.

- 3 Die Konzentration auf das textbasierte Drama mag als rückschrittlich erscheinen hinsichtlich der performativen Wende des Theaters und auch der Theaterwissenschaften; es handelt sich dabei jedoch nicht um die For-

rende und Akademiker, Schüler, Lehrer und anderweitig Berufstätige. Nach einer intensiven Probenphase (einen Monat täglich vier Stunden Probe) erfolgen vier Aufführungen des erarbeiteten Dramas, wobei sich Produktions- und Aufführungskosten ausschließlich aus Eintrittsgeldern und Werbeeinnahmen bestreiten.<sup>4</sup> Prinzipielles Anliegen dieses Bandes ist es vor diesem Hintergrund, das Phänomen Laientheater jenseits einer pejorativen Wertung als künstlerisch eigenständige Schaffensform vorzustellen und deren weitgehend brachliegendes Potential – wenn auch nur in Ansätzen – zu erschließen. Zu diesem Zweck wird eine identifikatorische und historische Annäherung versucht.

Das Phänomen Laientheater ist nicht zufällig bislang ein Stiefkind der Forschung:<sup>5</sup> Laientheater ist der markierte Gegensatz zum jeweiligen unmarkierten (und breit erforschten) „normalen“ Theater; da sich dieses durch die Epochen hindurch bekanntlich fundamental verän-

---

derung, zurück zum dramenorientierten Werktheater des 19. Jahrhunderts zu kehren, die Präferenz des Textes als Ausgangspunkt ist bei der Theatergruppe Bumerang vielmehr schlicht der Tatsache geschuldet, dass unter den Verantwortlichen viele Text- und Literaturwissenschaftler zu finden sind. Ein dramenorientierter Theaterbegriff wäre als allgemeiner Theaterbegriff freilich zu eng gefasst, eine Herangehensweise an eine Theaterproduktion über den Dramentext bleibt ungeachtet dessen aber nach wie vor eine legitime Möglichkeit, welche darüber hinaus einen überaus produktiven Zugang aus textwissenschaftlicher Beobachtung und künstlerischer Interpretation offeriert.

- 4 Vgl. <http://www.theatergruppe-bumerang.de>, eingesehen am 15.09.2010.
- 5 „Über das professionelle Theater wird viel geredet und noch mehr geschrieben – meist lamentiert, geklagt, geseufzt: über Kosten, Publikumsferne, Langeweile im Theater. Hier geben wir Ratschläge, hier wissen wir alles besser, hier fühlen *wir* uns als Profis, die natürlich immer schon wissen, warum diese Inszenierung nichts und jene eben noch tragbar ist. [...] Über das Schul- und Amateurtheater wird weniger geredet und noch weniger geschrieben – zuwenig geredet und geschrieben. Hier zu reflektieren, zu kritisieren, hier Ratschläge zu geben: da betreten wir unsicheren Boden, hier wird das Gelände äußerst uneben“ (Belgrad 1997, S. 5, Hervorhebung durch Belgrad).

dert, bestimmt sich auch die Identität seines jeweiligen Komplements, des Laientheaters, beständig neu. Dies erschwert seine Begriffsbestimmung und damit auch seine wissenschaftliche Fassbarkeit erheblich. Laientheater hat damit gewissermaßen keine eigene Natur, das Phänomen ist in seiner Existenz und Erscheinungsform abhängig von seinem Überbegriff Theater. Für dieses existiert bereits eine breit akzeptierte Formel, die allerdings nur heuristisch als brauchbar erscheint und gleichwohl weitere Identifikationsprobleme schafft, wie jüngst Hubert Habig ausführte:

„Der Schauspieler bringt [...] durch sein Agieren die Bühnenfigur hervor, während Zuschauer dem beiwohnen: A spielt B und C schaut dabei zu. Diese schlüssige Formel erweist sich bei näherem Hinsehen aber als tückisch. Zielt sie doch allzu leicht auf ein mechanisches Modell, in dem Ursache, A spielt B, und Wirkung, C nimmt das wahr, einen kausalen Zusammenhang bilden und sich gegenseitig versichern. Der Akt des Hervorbringens speise seinen Bestand nur aus Letzterem, dem Akt seiner Aufnahme.“<sup>6</sup>

Im Folgenden arbeitet sich Habig an der Identität des Schauspielers A ab, die er auch in der jüngsten theaterwissenschaftlichen Diskussion als „keineswegs gesichert“<sup>7</sup> deklariert; er formuliert schließlich einen umfangreichen Fragenkatalog, den er im Laufe seiner Monographie für das professionelle Theater abarbeitet:

„Was bringt A hervor? Was *ist* also B? Der Schauspieler *spielt* die ihm übertragene Figur, der Zuschauer schaut ihm *dabei* zu. Spielt er demnach nur, oder ist es ihm ernst mit seinem Spiel? Ist ihm das *Als ob* der Spielsituation immer präsent, oder verliert es sich für ihn im Lauf der Handlung? Anders gefragt: Was muss einer dramatischen Figur zukommen, dass sie für ihren Träger *wirklich spürbar* und für ihren Zuschauer *sinnlich fassbar* wird? Was verbirgt sich hinter dem Prädikat *spielt*, das die Ursache erst konstituiert? Was ist zuletzt *Schauspielen*, und welchen Vorgängen schaut der Zuschauer C zu?“<sup>8</sup>

---

6 Habig 2010, S. 9.

7 Habig 2010, S. 10.

8 Habig 2010, S. 10, Hervorhebungen durch Habig.

Diese Fragen stellen sich für das heutige Laientheater in gleicher Weise wie für das professionelle Theater – vielleicht sogar umso dringender und wahrscheinlich andere Antworten erfordernd: Die Identität des Laiendarstellers ist heute (anders als bei einem Profi) in der Regel eng in ein soziales Netz eingebunden, das mehr oder weniger dominant die Zuschauer C stellt. Im Schultheater etwa betrachten fast ausschließlich Mitschüler, Lehrer, Eltern und Verwandte in ihrer Rolle als C den Schüler A, der B darstellt und der damit in seiner privaten Identität in Auseinandersetzung mit der Rolle gebracht wird; beim Krippenspiel sieht die Kirchengemeinde als C ihrem Glaubensnachwuchs A zu, der heilige Personen B darstellt, über deren Identität in dieser Konstellation C weitaus genauere Vorstellungen als A haben kann; und bei freien, institutionell nicht gebundenen Laientheaterbühnen stellt sich das Publikum C nicht unwesentlich aus Freunden und Bekannten zusammen, die in der dargestellten Person B auch oft genug Eigenheiten des Darstellers A wiedererkennen oder diese gerne auch projizieren. Diese Interferenz zwischen privater Identität und Rollenidentität schlägt sich im heutigen Laientheater weitaus intensiver nieder als im professionellen Theater, so dass sich gerade Laientheater als Modellfall für fundamentale Fragen der Theaterwissenschaften anbieten dürfte, wie sie etwa Habig formuliert.

Doch zurück zur gesuchten Identität des Laientheaters, die nicht nur in der skizzierten Durchmischung von privater Identität und Rollenidentität des Darstellers *heute* eine grundsätzliche Besonderheit des Laientheaters darstellt, über die es vom „normalen“ Theater abgrenzbar ist: Ausgehend von der Theaterformel *A stellt B dar, während C zusieht* kann Laientheater grundsätzlich über die Identität von A bestimmt werden, oder anders ausgedrückt: Die historische Bestimmbarkeit des Laientheaters funktioniert über eine Nachzeichnung der Begriffsgeschichte des Laien. Eine solche erschöpfend anzufertigen, kann nicht Aufgabe dieses Einleitungsaufsatzes sein, wenige Aspekte müssen hier genügen, um sich dem Phänomen Laientheater historisch anzunähern und dabei auch bleibende Problemfelder zu skizzieren. Dafür seien zwei Stationen der diffusen Geschichte des Laientheaters herausgegriffen, seine Ausformung im Mittelalter und im 17. Jahrhundert, um als Vergleichsfolie für die heutige Erscheinung des Lai-

entheaters herangezogen werden zu können und das Phänomen auch in seiner historischen Dynamik fassbar zu machen.

Die historischen Ursprünge des Theaters werden meist (in Nachzeichnung der kulturellen Orientierung der Renaissance) in der griechischen Antike gesucht, die Ursprünge des Laientheaters aber finden sich wohl eher im europäischen Mittelalter. Um dies begreifbar zu machen, sei dennoch zunächst kurz auf das antike Theater eingegangen, das etwa Ekkehard Jürgens in seinem Aufsatz mit dem programmatischen Titel *Am Anfang war das Laienspiel* entgegen der hier postulierten These als Ursprung des Laientheaters ansieht:

„Das Theater begann [im antiken Athen] als Staats- und Volks-Theater gleichermaßen. Fast alle Darsteller waren erst einmal einfache Bürger, d.h. Handwerker, Händler, vielleicht sogar Bauern, in jedem Fall: ohne künstlerische Profession. Auch die Kritiker als solche gab es damals noch nicht; Laien bildeten das Massenpublikum, und Laien waren dazu auserkoren, die Inszenierung zu beurteilen bis hin zur Preisentscheidung. Künstlerisch vom Fach waren eigentlich nur die Dichterregisseure und ein paar Solodarsteller, pro Inszenierung nicht einmal eine Handvoll.“<sup>9</sup>

Den Begriff des Laien leitet Jürgens hier von griechisch *laos* = das Volk bzw. die Bürgerschaft ab, und in der Tat stellt sich das antike Theater dar als gänzlich von den Bürgern getragene Einrichtung. Gerade deswegen aber ist hier *nicht* sinnvollerweise von Laientheater zu sprechen: Es existiert in der Antike kein Komplementärphänomen, Theater geht auf im Theater der antiken Bürgerschaft und wird zumindest in seinen Hauptteilen von Laien getragen; Personen, die ihren Lebensunterhalt damit verdienen, sind unter den Laien als *laos* subsummiert und bilden kein eigenes Theater aus. Laientheater in diesem Sinne, als Synonym für Theater, verliert seine Trennschärfe und damit seine Notwendigkeit.

Hinzu kommt, dass es zumindest in Mitteleuropa keine direkte, kontinuierliche Verbindung zwischen dem heutigen Theater und dem antiken Theater gibt, denn im christlichen Mittelalter setzt das Theater

---

9 Jürgens 1997, S. 13.

neu an am gottesdienstlichen Kultus, vor allem an der Liturgie der Osterfeier:

„Das geistliche Spiel des Mittelalters ist aus der Liturgie erwachsen. [...] Die Diskussion um die Entstehung der liturgischen Osterfeier (dem Ausgangspunkt des mittelalterlichen Theaters) [...] hat immer wieder die Bedeutung Amalars von Metz (gest. 850) hervorgehoben, des berühmtesten mittelalterlichen Theoretikers der Liturgie. Amalar legt die Messe allegorisch aus: ‚Es wird alles und jedes gedeutet, Personen, Paramente, kirchliche Geräte, Zeitangaben, Handlungen‘, und zwar vor allem – und deshalb ist er für die Frage nach dem Ursprung des geistlichen Spiels so wichtig – rememorativ: Den Ablauf der Messe versteht er als eine Darstellung des Lebens Christi.“<sup>10</sup>

Im Folgenden begreift Steinbach die kirchenräumliche Trennung zwischen Klerikern und Laien, zwischen Priester und Gemeinde als grundlegend für das (Neu-) Entstehen des Phänomens Theater.<sup>11</sup> Im geistlichen Spiel, das zunächst als Osterfeier und – später – als Osterspiel eine klerikale Trägerschaft und gottesdienstliche Rahmung hat<sup>12</sup>, führen Kleriker (A) Laien (C) die Heilsgeschichte (B) vor. Dieser Laienbegriff ist gänzlich zu unterscheiden von seiner heutigen Füllung und bezeichnet den Nicht-Kleriker, der in der frühen Phase des mittelalterlichen Dramas lediglich das Publikum stellt. Wichtig für den diachronen Vergleich ist jedoch, dass sich im Laufe des Mittelalters Formen von Laientheater herausbilden, bei denen Laien Träger und Ausführer dramatischer Darstellungen sind. Die Identität von (A) als Nicht-Kleriker ist zwar nicht identisch mit der Identität von (A) im modernen Laientheater als Nicht-Profi, doch vergleichbar ist die Ausformung eines Komplementärphänomens zum „normalen“ Theater.

Das mittelalterliche Laientheater hat im Wesentlichen drei Ausprägungen: das Passionsspiel, das weltliche Spiel<sup>13</sup> und die höfische

---

10 Steinbach 1970, S. 3.

11 Vgl. Steinbach 1970, S. 4, aufbauend auf Trier.

12 Vgl. Knaeble/Wagner 2010, S. 116f.

13 Früher oftmals unter dem Begriff des Fastnachtsspiels irreführend zusammengefasst, vgl. Simon 2003, S. 1-4. Das Fastnachtsspiel ist sicherlich eine der wichtigsten Ausformungen des weltlichen Spiels, wird aber seiner

Literaturaufführung. Gemeinsam ist allen drei – sehr disparaten – Formen die deutsche Volkssprache, die sie vom lateinischen Theater des Klerus grundsätzlich absetzen, so dass die Unterscheidung von Klerustheater und Laientheater über Sprache und Aufführungsraum vielleicht sogar trennschärfer zu ziehen ist als die Unterscheidung von professionellem Theater und Laientheater in der Gegenwart.<sup>14</sup> Das aus dem Osterspiel entwachsende Passionsspiel emanzipierte sich zunehmend von kirchlicher Trägerschaft, so dass mehr und mehr die politische Gemeinde eines Ortes Darsteller (A) und Publikum (C) stellte.<sup>15</sup> Das weltliche Spiel war (wie auch das volkssprachliche geistliche Drama) in der städtischen Festkultur fest verankert und stellte seine Darsteller (A) aus der Bürgerschaft, oftmals (jedoch nicht ausschließlich) aus dem Bereich den zünftischen Handwerks.<sup>16</sup> Das historisch schwer fassbare Phänomen der höfischen Literatúraufführung geriet bislang kaum in den Blick, wenn es um die Darstellung mittelalterlicher Theaterkultur ging; doch genügt die rekonstruierbare Aufführungssituation der höfischen Literatur des Mittelalters der Theaterformel völlig: Ein Erzähler (A) erzählt einem höfischen Publikum (C) Geschichten, die in ihrer überlieferten Textgestalt oft genug eine ausdifferenzierte Erzählerrolle (B) bereit stellen, die dramatisch darzustellen die Aufgabe eines höfischen Erzählers war.<sup>17</sup>

Allen drei Ausprägungen eines mittelalterlichen Laientheaters ist gemeinsam, dass Darsteller (A) in erster Linie Laien im Sinne von Nicht-Klerikern sind. Die Erzähler der höfischen Literatur allerdings

---

umfassenden und weit über den Zeitraum der Fastnacht hinausreichenden Bedeutung in der städtischen Festkultur nicht gerecht.

14 Vgl. Fischer-Lichte 1999, S. 23: „Während die lateinischen Spiele – ebenso wie die lateinischen Feiern – in der Kirche aufgeführt wurden, errichtete man die Bühne für die volkssprachlichen Spiele auf dem Marktplatz“.

15 Vgl. dazu ausführlicher Knaeble/Wagner 2010.

16 Vgl. Fischer-Lichte 1999, S. 15-17.

17 Um nur die offensichtlichste und unumgängliche Rolle zu nennen, die der höfische Erzähler zu verkörpern hat. Darüber hinaus liegt es sicherlich nahe, dass er auch die Redeanteile der Figuren der Geschichte dramatisch ausgestaltete, worüber es freilich keinerlei Aufführungsberichte gibt.

können in ihrer Identität als fahrende Sänger oder auch Ministeriale des Hofes durchaus als Theaterprofis im neuzeitlichen Sinne verstanden werden, da sie mit der künstlerischen Beschäftigung des Vortrags in der Tat ihren Lebensunterhalt verdienten. Während die höfische Literaturaufführung historisch an den mittelalterlichen Adelshof gebunden ist und keine weiterreichende Tradition ausbilden konnte, haben sich das derbe weltliche Spiel und das laikale Passionsspiel als Formen des Laientheaters bis heute – sicherlich *mutatis mutandis* – halten können. Diese beiden diachronen Linien stehen damit quer zu einem synchronen Verständnis des heutigen Laientheaters, dessen Laienbegriff sich vom professionellen Darsteller (und nicht mehr vom Kleriker) abgrenzt.

Dennoch lassen sich keine allgemeinen, ungebrochenen Linien vom mittelalterlichen Laientheater zum heutigen Laientheater ziehen, etwa aufgrund einer geringen Institutionalisierung und fehlender künstlerische Ausbildung der Darsteller, Aspekte, die (mit Ausnahme der höfischen Literaturaufführung) hier wie dort am Laientheater festzumachen sind. Beleg dafür ist die Theaterpraxis des 16. und 17. Jahrhunderts, die vor allem im konfessionellen Schultheater eine bedeutsame Ausprägung des Laientheaters erfahren hat. Das neuzeitliche „normale“ Theater setzt sich nach Eduard Neuhaus vor allem in drei Punkten vom mittelalterlichen Theater ab: Guckkastenbühne, aristotelische Dramatik und Berufsschauspielertum. Das konfessionelle Schultheater in Deutschland erachtet er dabei als gewichtige Ausnahme:

„Im deutschsprachigen Raum ging die Entwicklung des neu-aristotelischen Sprechtheaters zunächst nicht mit der Professionalisierung des Schauspielertums einher. Im Bereich des Schauspiels war das Berufstheater in Deutschland bis weit ins 18. Jahrhundert hinein eine Domäne der Wanderbühnen von oft zweifelhaftem Ruf und einem Repertoire, das eher auf die Bedürfnisse von Jahrmarktsbelustigungen zugeschnitten war als auf die Interessen eines literarisch gebildeten Publikums. Die Berufsschauspieler der Wanderbühnen fanden weder zur Gründung fester Theaterbetriebe, noch konnten sie in der Qualität

der Stücke und der Aufführungen mit dem konkurrieren, was für nicht professionelle Schultheater erreichbar war.“<sup>18</sup>

Das konfessionelle Schultheater stellt in historischer Hinsicht einen (verwirrenden) Mittler zwischen einer mittelalterlichen Identität des Laienbegriffs und seiner heutigen dar: Einerseits steht ihm mit der Wanderbühne ein dahingehend professionelles Theater gegenüber, dass die Darsteller der Wanderbühne ihren Lebensunterhalt mit dem Schauspiel verdienen; andererseits aber ist das konfessionelle Schultheater stärker institutionalisiert als das professionelle Wandertheater und erscheint auch vom Standpunkt der künstlerischen Qualität auf der Basis einer gezielten Ausbildung als höherstehend als das synchrone professionelle Theater. Auch im Blick auf das Mittelalter erscheint das Schultheater als Mittler, da es zunächst die kirchliche Trägerschaft formal und inhaltlich transportiert (und damit im mittelalterlichen Sinne zunächst nicht laikal ist), in seiner Geschichte sich aber von der Institution Kirche zunehmend löst:

„Die Schultheater des 16. und 17. Jahrhunderts waren konfessionell gebunden und wurden insofern auch als Instrumente des Glaubenskampfes genutzt. Aber weder das ältere protestantische Schultheater noch das in der Gegenreformation konzipierte Jesuitentheater waren ihrer Zielsetzung nach ausschließlich auf konfessionelle Agitation fixiert. Beiderseits verlor denn auch die konfessionelle Komponente im weiteren Verlauf des 17. Jahrhunderts zunehmend an Bedeutung.“<sup>19</sup>

Anstatt der klerikalen Füllung setzte sich das Schultheater zunehmend allgemein pädagogische Ziele wie Sprachbeherrschung und Einübung von Verhaltensmodellen.<sup>20</sup> Das Laientheater des 17. Jahrhunderts erweist sich damit als Komplement einerseits zu einem streng kirchlich orientierten Klerikertheater mittelalterlichen Zuschnitts als auch andererseits zu einem an wirtschaftlichem Gewinn orientierten Profitheater modernen Zuschnitts. Besonders wichtig für einen diachro-

---

18 Haueis 1997, S. 23f.

19 Haueis 1997, S. 24.

20 Vgl. Haueis 1997, S. 24.

nen Vergleich unterschiedlicher Ausprägungen des Laientheaters ist, dass diese beiderseitige Abkoppelung nicht notwendigerweise einhergeht mit fehlender künstlerischer Ausbildung und schon gar nicht zwangsweise mit fehlender künstlerischer Qualität: Die Institution Schule organisiert dies selbst und ohne hierarchische Orientierung an Kirche oder Profitheater.

Das heutige Laientheater ist als Gegenstück zum professionellen, berufsmäßigen Theater geprägt von fehlender professioneller Ausbildung, grundsätzlich schwacher Institutionalisierung und fehlender wirtschaftlicher Zielsetzung: Der Laiendarsteller (A) ist kein ausgebildeter Berufskünstler, der mit seiner Kunst seinen Lebensunterhalt verdient. Institutionell ist das Laientheater nicht fest gebunden, es kann mannigfaltigen Institutionen zugeordnet sein: Schule, Universität, Kirche, Heilanstalt, Vereinswesen, Partei etc. Das heutige Laientheater ist als Ganzes demnach nicht positiv bestimmbar, es ist zunächst das Negativ des institutionalisierten „normalen“ Theaters. Wie die historische Skizze allerdings gezeigt hat, gehört die Tendenz zur Negativbestimmung des Laientheaters zu seiner Natur, lediglich die abzugrenzenden Gegenbilder wechseln; während sich in der Vormoderne jedoch einigermaßen feste Identitäten von Laientheater herausbilden konnten, ist das Laientheater heute vielmehr ein diffuser Bereich, der sich in umfassenderem Sinne als in Mittelalter und Barock durch Freiheit auszeichnet.

Der Umgang mit Freiheit ist allerdings eine äußerst schwierige Aufgabe, die die Darsteller des Laientheaters (A) bewältigen müssen; Herta-Elisabeth Renk begreift diese Freiheit etwas vorschnell als positiven Wert:

„Grundsätzlich hat das Amateurtheater hierzulande keinen festen Spielraum, keinen Kostümfundus, keine installierte oder auch nur ausreichende Beleuchtung – also ist es ihm auch freigestellt, überallhin zu gehen, wo es einen interessanten Raum, einen guten sozialen oder ästhetischen Grund für das Spiel findet.“<sup>21</sup>

---

21 Renk 1997, S. 52.

Hier ist eine Paradoxie der Freiheit impliziert, die darauf aufbaut, dass Freiheit eine Disposition, jedoch keine konkrete Arbeitsgrundlage des Laientheaters ist: Um Theater welcher Form auch immer machen zu können, zwingt die Freiheit das Laientheater dazu, sich selbst eine Form zu geben, sprich: sich selbst Grenzen zu setzen. Die Freiheit des Laientheaters erzwingt also paradoxerweise zugleich eine selbstverwaltete Beschneidung dieser Freiheit. Dies kann in einem Schritt und relativ umfassend geschehen, indem Laientheater sich einer festen Institution unterordnet (etwa Schule, Kirche, Partei), womit oft genug aber jedwede Freiheit des Laientheaters verloren geht; dies kann in Eigenregie und Schritt für Schritt geschehen, was vor allem in der Anfangsphase einen Organisationsaufwand erfordert, der einer vollbefruchteten Belastung in nichts nachsteht. Wie auch immer: Freiheit bleibt die *Ausgangsdisposition* des Laientheaters, sie kann aus praktischen Gründen nicht sein *Ziel* sein. Jede Form des Laientheaters muss Setzungen in Bezug auf alle Aspekte machen bzw. als vorgegeben hinnehmen, die die grundsätzliche Freiheit des Laientheaters bestimmen: Ausbildung der Akteure, Finanzierung der Aufführung, Institutionalisierung der Theaterformation. Freilich kann sich eine Laientheatergruppe dafür entscheiden, die fehlende künstlerische Ausbildung ihrer Akteure zu akzeptieren ohne weitere Fortbildungsmaßnahmen – sie setzt sich dann aber gegebenenfalls Grenzen in Hinsicht der künstlerischen Qualität; freilich kann sie sich dafür entscheiden, sich keine Gedanken um Finanzierung der Aufführung zu machen – sie setzt sich damit aber Grenzen in Bezug auf Bühnengestaltung, Maske, Kostüm, Werbung; freilich kann sie versuchen, jedwede Institutionalisierung zu meiden – sie setzt sich damit aber Grenzen hinsichtlich der Dauer und Intensität ihrer sozialen Existenz. Es bleibt sicherlich dabei, dass hinsichtlich Finanzkraft, Ausbildung und Institutionalisierung das Laientheater hinter den Möglichkeiten des sich über diese Größen definierenden Profitheaters zurückbleibt, doch muss sich jede Theaterformation im Raum zwischen absoluter Freiheit und Professionalisierung einnischen. Wenn das Laientheater nicht nur blind auf seine Freiheit insistiert, sondern die notwendige Arbeit, sich selbst Grenzen und Ziele zu setzen, konsequent angeht, dann besteht tatsächlich die Chance, auch längerfristig ein auch in künstlerischer Hinsicht wertvolles Gegenstück zum Profitheater zu werden.

Die Beiträge des vorliegenden Sammelbandes beschäftigen sich mit diesem notwendigen Akt der Einnischung, einerseits ausgehend von einem konkreten Modell des Laientheaters und damit praxisorientiert, andererseits operierend mit theoretischen Modellen, um auch eine Abstrahierung und Anwendung auf andere Ausprägungen des Laientheaters zu ermöglichen.

Mit dem Aspekt der fehlenden professionellen Schauspielausbildung beschäftigen sich grundsätzlich die Aufsätze *Regie im Laientheater* (Silvan Wagner / Britta Ender) und *Arbeitsstrukturen des Laientheaters* (Britta Ender).

#### *Regie im Laientheater*

Das rezente Laientheater ist dadurch bestimmt, dass seine Darsteller keine schauspielerische Ausbildung durchlaufen haben; damit kann auch die Regie bei der Probe nicht einfach auf in dieser Hinsicht professionelle Grundlagen der Darstellungsweise, Sprechtechnik, Übeformen etc. zurückgreifen. Dies stellt jedoch nur auf den ersten Blick eine eindeutige Beschränkung dar: Auch Laiendarsteller können bei ihrem Spiel auf Grundlagen zurückgreifen, die nicht nur fundamentale Bestandteile ihrer *conditio humana* sind, sondern die sie darüber hinaus auch in der Regel in einem bestimmten Bereich gezielt und gesteuert einzusetzen wissen – sei es als Schüler, Handwerker, Studenten, Lehrer, Dienstleister o.ä. Vornehmliche Aufgabe einer Regie im Laientheater ist es daher, die bereits vorliegenden und teilweise professionellen Erfahrungen der Darsteller aus den unterschiedlichsten Gebieten anschlussfähig für die Bühnenarbeit zu machen. Dies erhebt weitaus höhere Anforderungen an die Regie des Laientheaters, die damit den Einzelnen schnell überfordern kann. Dieses Dilemma kann durch eine dynamische Arbeitsteilung gelöst werden.

#### *Arbeitsstrukturen des Laientheaters*

Der Begriff Laie bezieht sich allenfalls darauf, dass die Darsteller des Laientheaters keine professionelle Bühnenausbildung durchlaufen haben, nicht aber darauf, dass nicht auch im Laientheater mit professionellen Strukturen gearbeitet werden kann. Der Artikel stellt dar, welche organisatorischen Strukturen des professionellen Theaters auf das Laientheater übertragen werden können (Arbeitsteilung nach Gewerken, Probenpläne, Sperrzeiten etc.) und untersucht ebenfalls, welche (ggf. auch vom Profibereich abweichenden) Strukturen speziell das Laientheater erfordert.

Die fehlende schauspielerische Ausbildung der Darsteller des Laientheaters impliziert nicht, dass sie nicht musisch begabt sind oder in künstlerischen Nachbarbereichen des Schauspiels eine entsprechende professionelle Ausbildung durchlaufen haben. Die Aufsätze *Sprache als Musik. Ein Technikprogramm* (Silvan Wagner) und *Schminken als Vollendung des ‚natürlichen Gesichtsgemäldes‘* (Eva Wagner) skizzieren Möglichkeiten, künstlerische Begabungen der Laiendarsteller in Musik bzw. bildender Kunst für die dramatische Arbeit zu nutzen.

#### *Sprache als Musik. Ein Technikprogramm*

Genauso wie Musik ist auch Sprache in ihrer Klanglichkeit hochkomplex, baut aber ebenso wie jene auf wenige grundlegende physikalische Parameter auf (Lautstärke, Tempo, Rhythmus, Tonhöhe etc.). Im Unterschied zu Musik erfolgt das Erlernen zumindest der Muttersprache nicht im Rahmen eines reflektierenden Unterrichtsgeschehens, so dass Form und Struktur des Einsatzes physikalischer Mittel zur Sinnerzeugung mittels Sprache oftmals – und vor allem im Laienbereich – nicht bewusst eingesetzt werden können; damit liegt bei den Darstellern zwar eine differenzierte Sprachklanglichkeit vor, auf deren einzelne Bestimmungsgrößen jedoch im Rahmen der Texterarbeitung nicht aktiv und willkürlich zugegriffen werden kann. Abhilfe kann hier ein am musikalischen Instrumentalunterricht orientiertes Technikprogramm Sprache schaffen, das in komplexitätsreduzierten Übungen den aktiven Zugriff auf einzelne technische Parameter der Sprache einübt und damit das Umsetzen klanglicher Anweisungen in der Probe vorbereitet.

#### *Schminken als Vollendung des ‚natürlichen Gesichtsgemäldes‘*

Das Gesicht eines Schauspielers kann man als bemalte Leinwand begreifen, auf die bestimmte Vertiefungen und Erhebungen eingezeichnet sind. Diese können durch das Zusammenspiel von hellen und dunklen Farben optisch nach vorne, hinten und zur Seite verschoben werden, womit man beispielsweise einen Verjüngungseffekt erzielen kann oder eine charakterphysiognomische Veränderung. Was genau und in welchem Maß ein Gesicht verwandelt werden kann, wird stets durch das „natürliche Gesichtsgemälde“ bestimmt und beschränkt.

Schminkanleitungen in Ratgeberliteratur zur Veränderungen eines Gesichtes sind meist normativ organisiert. Oft erbringen sie aber nicht das erwünschte Ergebnis. Scheinbar versagt bei einem derartigen Misserfolg der laikale Mas-

kenbildner. Tatsächlich geht der Misserfolg auf das „natürliche Gesichtsgemälde“ zurück, das unvorhergesehene, paradoxe „Effekte“ in sich birgt. Um ein Maskenziel zu erreichen, brauchen Laienmaskenbildner daher praktikable Theorien, die es ihnen erlauben, außerplanmäßig und probierend vorzugehen und ein zufriedenstellendes Ergebnis zu erreichen.

Bei allem ehrenamtlichen Organisationsgeschick und bei allen institutionalisierten Möglichkeiten der finanziellen Unterstützung des Laientheaters bleibt dessen Finanzlage im Vergleich zum Profitheater prekär. Dies hat vor allem Auswirkungen auf die Möglichkeiten der Bühnengestaltung. Der Aufsatz *Die Bühne als performativ hergestellter Beobachtungsraum* (Susanne Knaeble) beleuchtet Möglichkeiten, auf darstellerischer Ebene mit diesem Problem umzugehen; der Aufsatz *Das (nicht) perfekte Bühnenbild* (Guido Apel / Susanne Knaeble) zieht analog Konsequenzen für die Bühnengestaltung.

#### *Die Bühne als performativ hergestellter Beobachtungsraum*

Der Handlungsraum Bühne ist grundsätzlich durch Abstraktion und symbolische Repräsentation gekennzeichnet. Insbesondere im Vergleich zum Medium Film erscheint es als evident, dass es im Theater allgemein und speziell im Laientheater – nur sehr selten kann ein opulentes Bühnenbild verwendet werden – primär das Agieren des Schauspielers ist, das einen imaginativen ‚Raum‘ für die Beobachter erzeugt: Seine beobachtbar gemachten Sinneswahrnehmungen installieren den ‚Raum‘ und die Szene, die für den Zuschauer nur so als ‚Welt‘ erfahrbar sind. Sein Blick markiert z.B. die Enge oder Weite des Raumes, oder an seiner Mimik und Gestik wird die unerträgliche Lautstärke des Radios sichtbar.

Der Beitrag versucht in erster Linie theoretisch zu beschreiben, warum die Größe ‚Raum‘ auf der Bühne grundsätzlich als etwas Produziertes zu begreifen ist und weshalb sie nie unabhängig von ihrer Wirkung, nie unabhängig vom performativen Handeln gesehen werden kann.

#### *Das (nicht) perfekte Bühnenbild*

Gerade im Laientheater stellt sich häufig das Problem, dass eine naturalistische Umsetzung des Bühnenbildes mit zu großem Aufwand und zu hohen Kosten verbunden wäre. Von der Vorstellung einer „perfekten“ Kulisse im Sinne von Panoramagemälden oder echten Bäumen auf der Bühne hin zur starken Ver-

einfachung derselben sind einige Gedankenschritte notwendig. Durch die Abstrahierung der Kulisse und die Reduzierung auf das Wesentliche lässt sich auch mit einfachen Mitteln ein wirkungsvolles Bühnenbild erzeugen, das mitunter einem Stück eine ganz neue Dimension verleihen kann – und perfekt ist, weil es eben nicht perfekt ist.

Zwar ist Laientheater nicht *per se* institutionalisiert, doch hat es komplementär Teil am institutionalisierten, „normalen“ Theater und auch an den Institutionen Film und Fernsehen, deren Bedeutung in den letzten Jahrzehnten immens gewachsen ist. Die Aufsätze *Lampenfieber: Entstehen und Vergehen einer Kulturkrankheit* (Silvan Wagner) und *Vom Nutzen des narrativen Reality TV* (Eva Wagner) beschäftigen sich mit den Interferenzen, die sich zwischen den unterschiedlichen Formen künstlerischer dramatischer Darstellung gerade für das Laientheater ergeben und zeigen Probleme und Chancen auf.

#### *Lampenfieber: Entstehen und Vergehen einer Kulturkrankheit*

Gewöhnlicherweise wird das Phänomen Lampenfieber im Rahmen der Psychologie abgehandelt; hier liegen auch mittlerweile zahlreiche (populär-)wissenschaftliche Abhandlungen vor, die Lampenfieber in erster Linie als anthropologische Konstante begreifen und die darin freigesetzten Energien für den Auftritt nutzbar machen wollen. Im Gegensatz dazu kann eine kulturwissenschaftliche Betrachtung die Geschichte des Lampenfiebers und damit seinen Konstruktcharakter aufzeigen: Lampenfieber entsteht erst in einer relativ späten Phase der Theatergeschichte als Folge spezifischer Auftrittsmodalitäten, die den Darsteller von einem abgeschotteten Publikum gleichsam voyeuristisch beobachten lassen, wobei gerade dieser Aspekt gewöhnlicherweise nicht in der Performanz des Darstellers beleuchtet werden darf. An der Auftrittssituation selbst kann auch eine Arbeit am eigenen Lampenfieber gerade des Laienschauspielers ansetzen, da in diesem Bereich die Auftrittsmodalitäten weitaus leichter eingeübt oder aber auch verändert werden können als im institutionalisierten, professionellen Theater.

#### *Vom Nutzen des narrativen Reality TV*

Austins Sprechakttheorie und Goffmans Theorie des Alltagtheaters bieten eine Grundlage, um alltägliches Acting zu analysieren: Im Privatfernsehen, das spätestens seit den 90er Jahren als Leitmedium unserer Gesellschaft wahrge-

nommen werden kann, werden tagtäglich mehrere Reality-TV-Formate gesendet. Eine Spielart ist das *narrative Reality TV*, in dem Laiendarsteller reale oder realitätsnahe Ereignisse zeigen oder nachstellen wie beispielsweise in der Gerichtshow *Richter Alexander Hold* oder der Psychoshow *Zwei bei Kallwass*. In ihnen agieren Menschen „wie du und ich“ als Schauspieler bzw. Darsteller. Die Art darzustellen zeichnet sich durch intensives Overacting aus, dem Doppeln von Gesagtem durch Körperhandeln beziehungsweise umgekehrt dem Doppeln einer Körperhandlung durch Verbalisierung. Ergebnis dieser Darstellungsweise ist, dass nicht nur eine Rolle dargestellt wird, sondern immer auch dargestellt wird, dass dargestellt wird.

Die Beschäftigung mit dem narrativen Reality TV bietet gerade Laienschauspielern, die nicht in das institutionalisierte Theater eingebunden sind, die Gelegenheit, Darstellungsmöglichkeiten und deren (ggf. übertriebene) Wirkung kritisch zu analysieren und die dabei gewonnenen Erfahrungen in das eigene Spiel einzubauen.
